# Supplementary material for: Pair of chiral 2D silver(i) enantiomers: chiral recognition of l- and d-histidine via differential pulse voltammetry
Source: Royal Society of Chemistry journal article supplement (doi:10.1039/d1dt03371a), 2022-01-01
Supplement: d1dt03371a1.pdf [file d1dt03371a1.pdf]

<Electronic Supplementary Information>

**Pair of chiral 2D silver(I) enantiomers: chiral recognition of *l*- and *d*-histidine via differential pulse voltammetry**

Dongwon Kim,<sup>a</sup> Kyeong-Deok Seo,<sup>a</sup> Yoon-Bo Shim,<sup>a</sup> Kyungsuh Lee,<sup>a</sup> Sang Hak Lee,<sup>a</sup> Young-A Lee,<sup>\*,b</sup> and Ok-Sang Jung<sup>\*,a</sup>

<sup>a</sup>Department of Chemistry, Pusan National University, Busan 46241, Republic of Korea Fax: (+82) 51-5163522;

Tel: (+82) 51-5103240; E-mail: oksjung@pusan.ac.kr

<sup>b</sup>Department of Chemistry, Jeonbuk National University, Jeonju 54896, Korea.

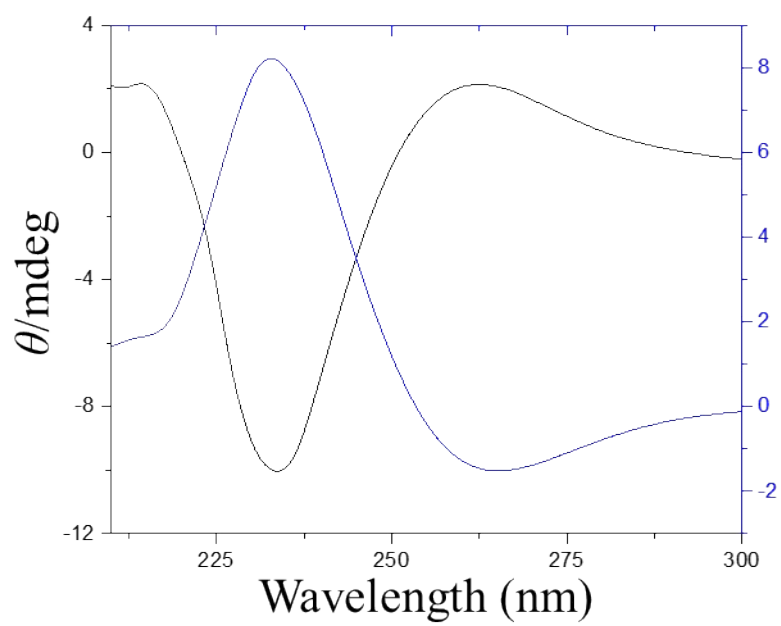

**Fig. S1.** Circular dichroism (CD) spectra of *r,s*-L (blue line) and *s,r*-L (black line).

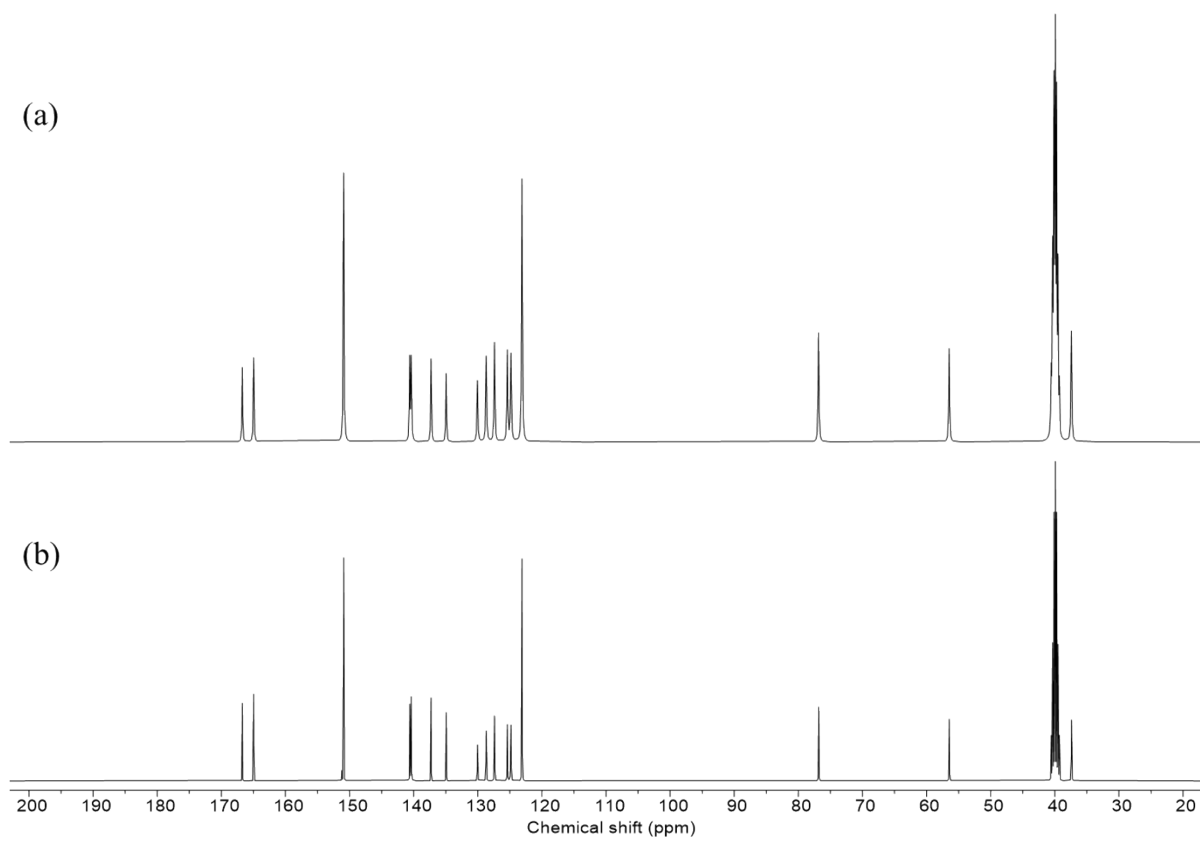

**Fig. S2**  $^{13}\text{C}$  NMR spectra for *s,r*-L (a), and *r,s*-L (b) in  $\text{Me}_2\text{SO}-d_6$ .

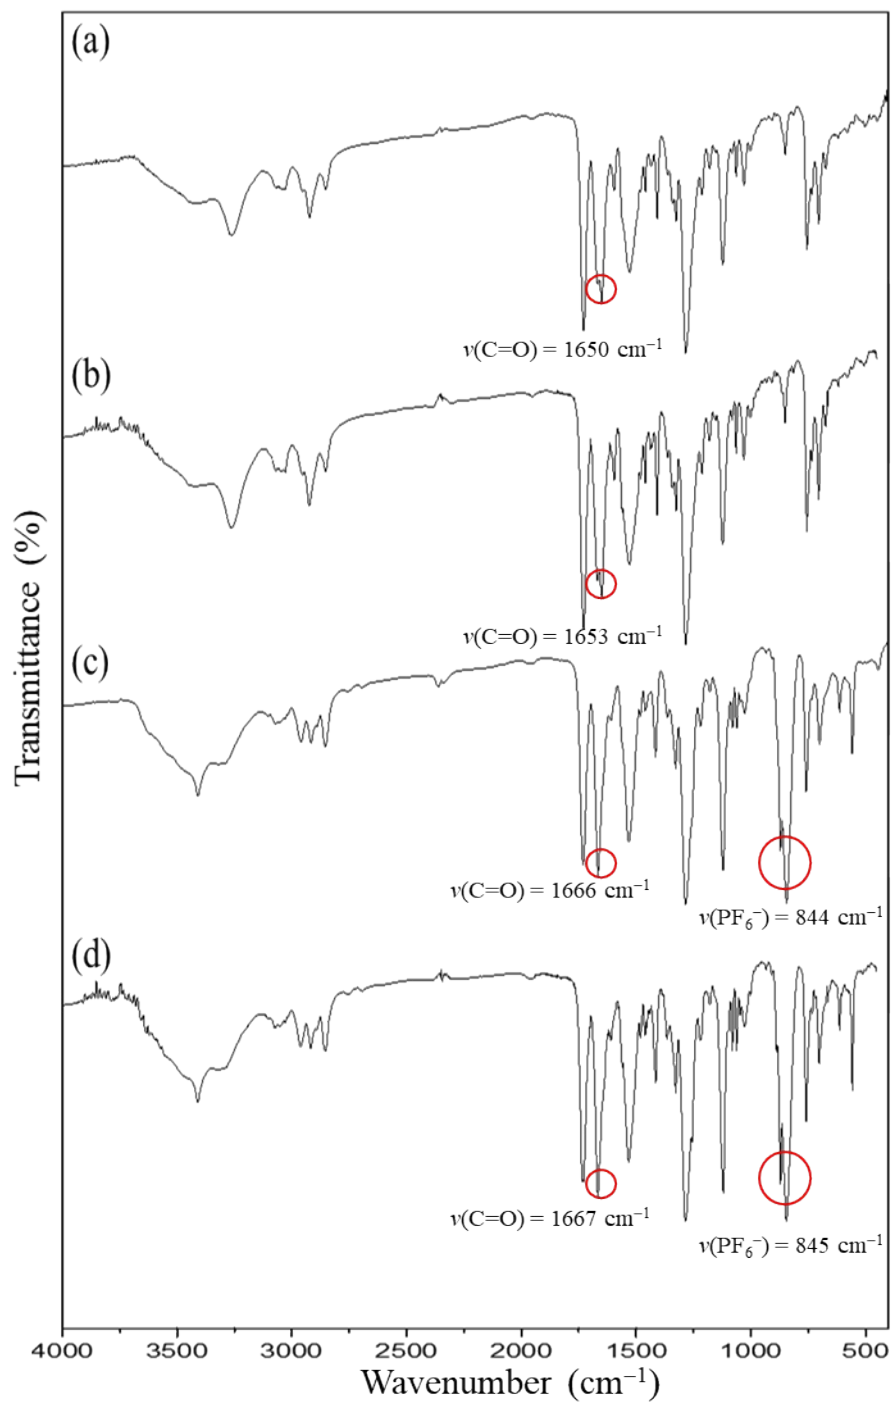

**Fig. S3** IR spectra for *s,r*-L (a), *r,s*-L (b),  $[\text{Ag}(s,r\text{-L})](\text{PF}_6) \cdot 3\text{C}_4\text{H}_8\text{O}_2 \cdot 0.5\text{H}_2\text{O}$  (c), and  $[\text{Ag}(r,s\text{-L})](\text{PF}_6) \cdot 3\text{C}_4\text{H}_8\text{O}_2 \cdot 0.5\text{H}_2\text{O}$  (d).

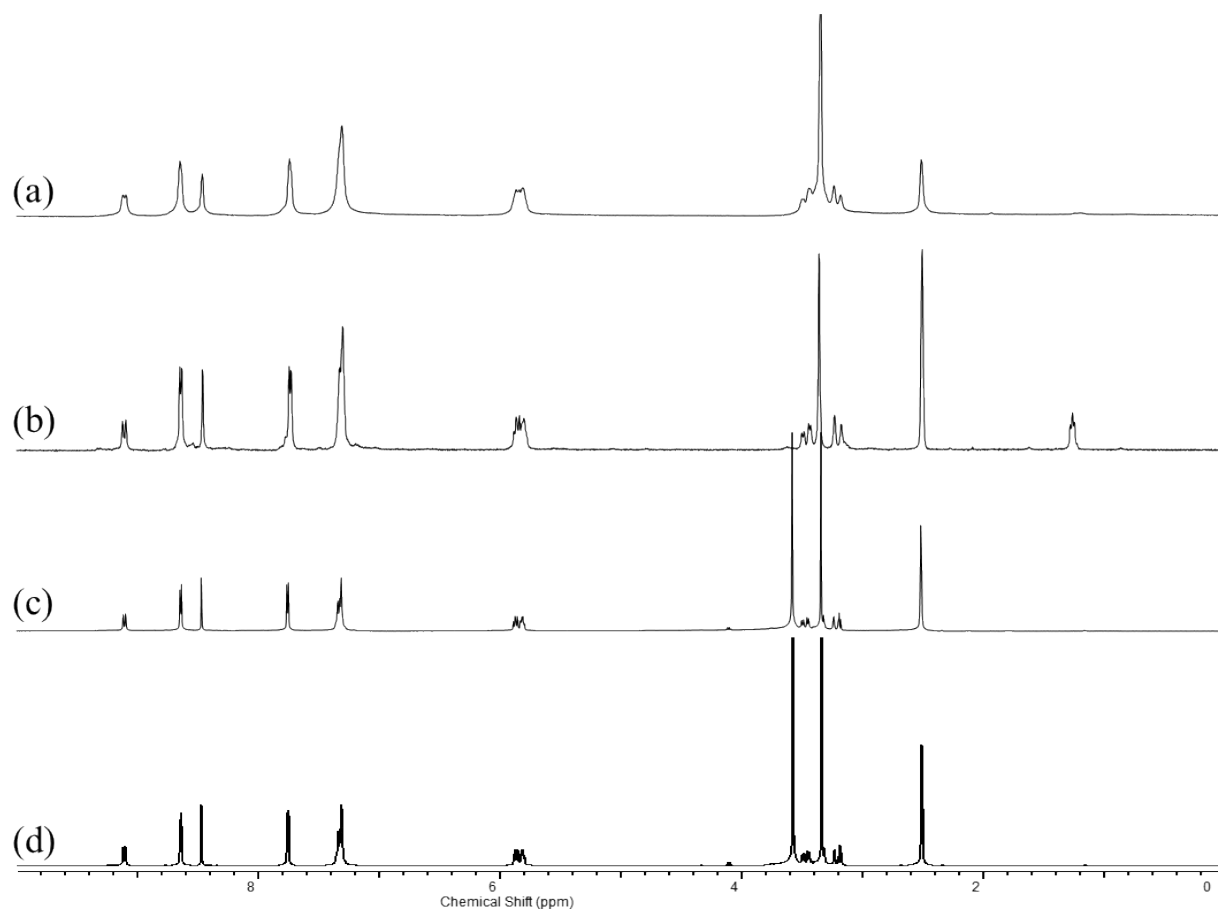

**Fig. S4**  $^1\text{H}$  NMR spectra for *s,r*-L (a), *r,s*-L (b),  $[\text{Ag}(\textit{r,s}\text{-L})](\text{PF}_6) \cdot 3\text{C}_4\text{H}_8\text{O}_2 \cdot 0.5\text{H}_2\text{O}$  (c, *dissociated*), and  $[\text{Ag}(\textit{r,s}\text{-L})](\text{PF}_6) \cdot 3\text{C}_4\text{H}_8\text{O}_2 \cdot 0.5\text{H}_2\text{O}$  (d, *dissociated*) in  $\text{Me}_2\text{SO}-d_6$ .

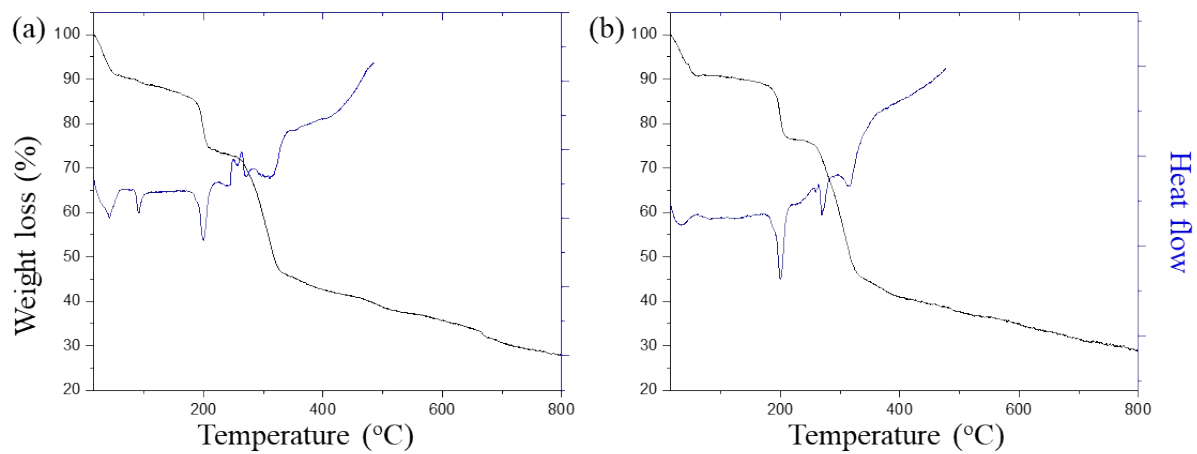

**Fig. S5** TG and DSC curves for  $[\text{Ag}(s,r\text{-}L)](\text{PF}_6) \cdot 3\text{C}_4\text{H}_8\text{O}_2 \cdot 0.5\text{H}_2\text{O}$  (a), and  $[\text{Ag}(r,s\text{-}L)](\text{PF}_6) \cdot 3\text{C}_4\text{H}_8\text{O}_2 \cdot 0.5\text{H}_2\text{O}$  (b).

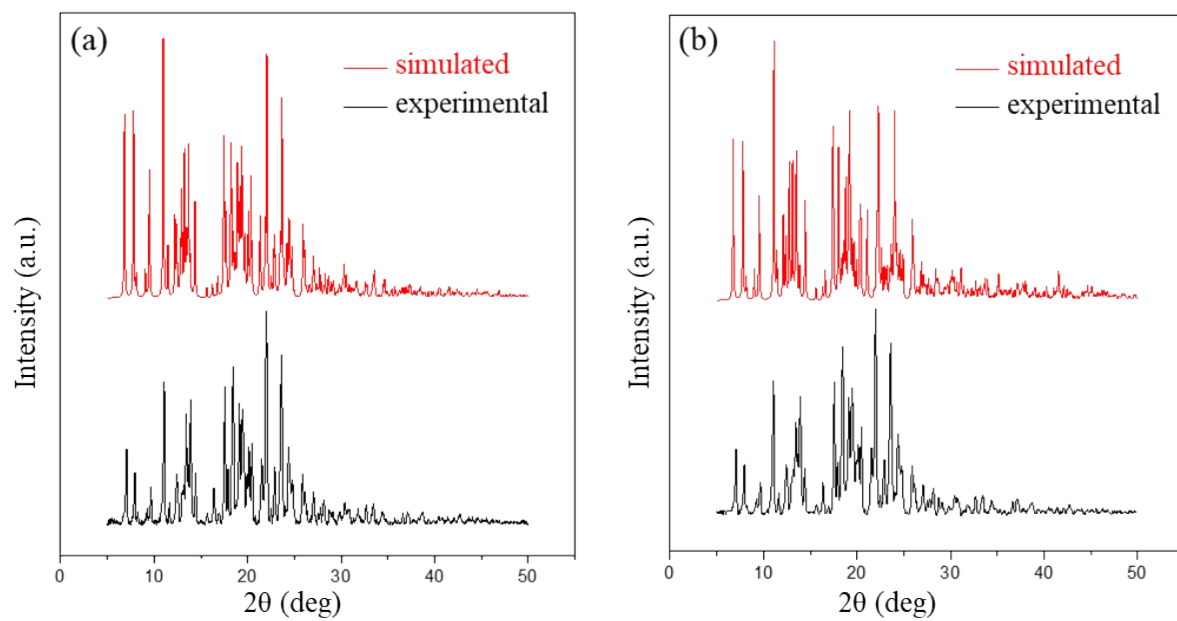

**Fig. S6** PXR D patterns for  $[\text{Ag}(s,r\text{-L})](\text{PF}_6) \cdot 3\text{C}_4\text{H}_8\text{O}_2 \cdot 0.5\text{H}_2\text{O}$  (a), and  $[\text{Ag}(r,s\text{-L})](\text{PF}_6) \cdot 3\text{C}_4\text{H}_8\text{O}_2 \cdot 0.5\text{H}_2\text{O}$  (b).

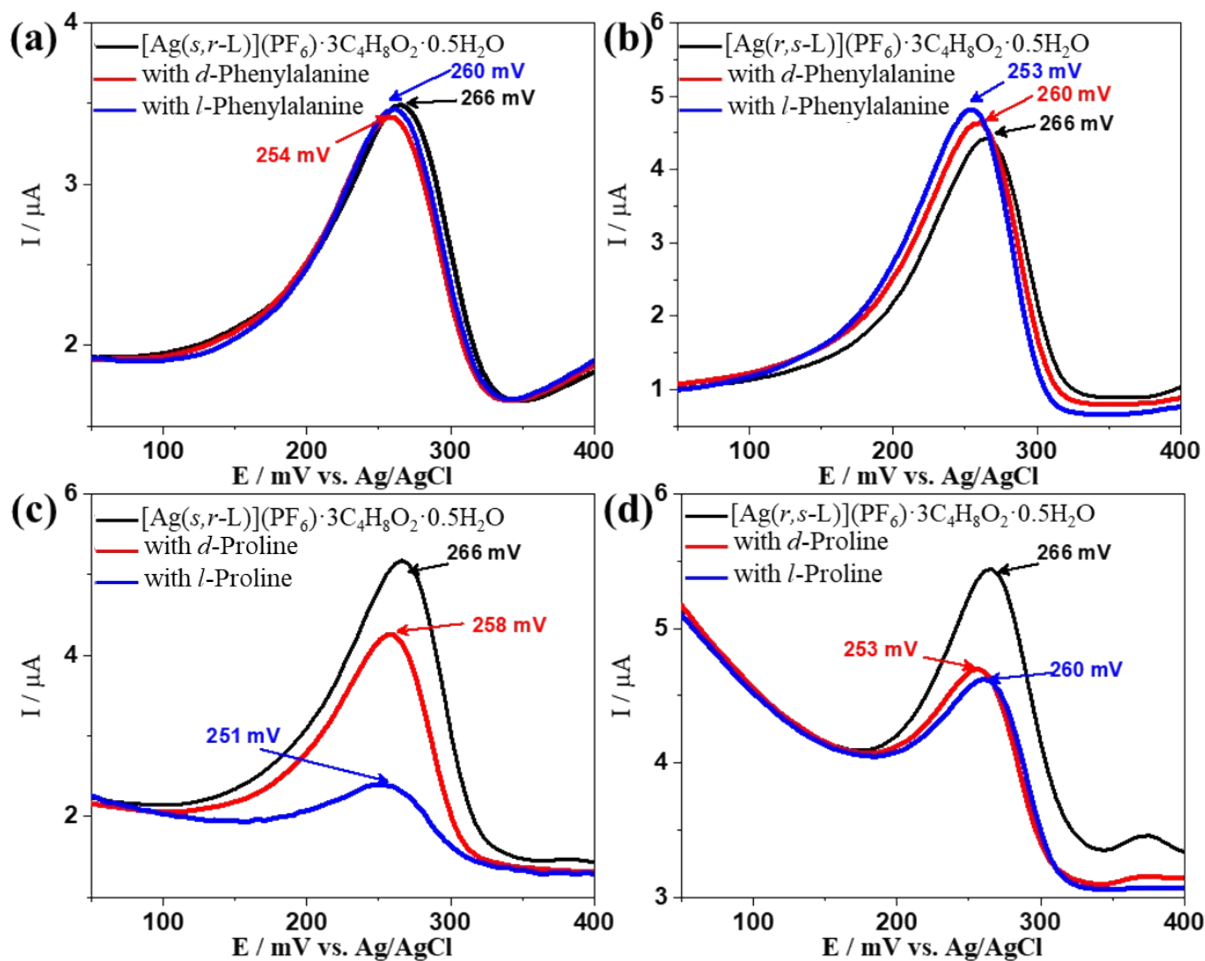

**Fig. S7** DPVs recorded for  $[\text{Ag}(s,r\text{-L})](\text{PF}_6) \cdot 3\text{C}_4\text{H}_8\text{O}_2 \cdot 0.5\text{H}_2\text{O}$  in the presence of 1.0 mM *l*- and *d*- forms of phenylalanine (a), proline (c), and  $[\text{Ag}(r,s\text{-L})](\text{PF}_6) \cdot 3\text{C}_4\text{H}_8\text{O}_2 \cdot 0.5\text{H}_2\text{O}$  for *l*- and *d*- forms of phenylalanine (b), and proline (d).



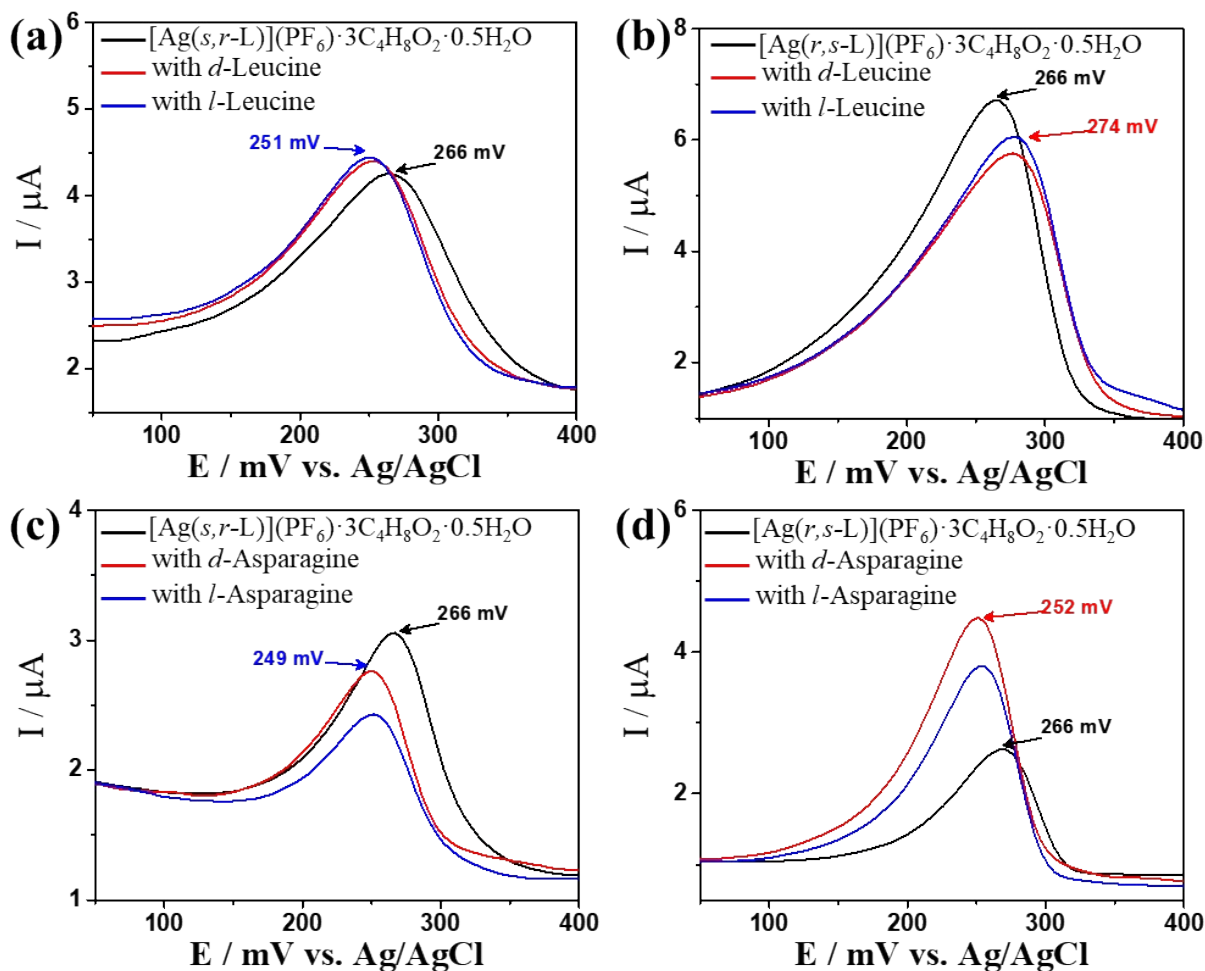

**Fig. S8** DPVs recorded for  $[\text{Ag}(s,r\text{-L})](\text{PF}_6) \cdot 3\text{C}_4\text{H}_8\text{O}_2 \cdot 0.5\text{H}_2\text{O}$  in the presence of 1.0 mM  $l$ - and  $d$ - forms of leucine (a), asparagine (c), and  $[\text{Ag}(r,s\text{-L})](\text{PF}_6) \cdot 3\text{C}_4\text{H}_8\text{O}_2 \cdot 0.5\text{H}_2\text{O}$  for  $l$ - and  $d$ - forms of leucine (b), and asparagine (d).
